# Supplementary material
Source: MDPI journal article supplement (https://www.mdpi.com/2073-4395/11/2/207)
Supplement: s1 [file s1]

Table S1: Antioxidant scavenging activity of individual “Tulsi” lines (total 79) grown *in vitro* when compared to a trolox equivalent ( $\mu\text{molTE/g}$ ) standard using DPPH antioxidant assay. Means from all the lines were compared with each other using Tukey’s test. Columns with same letter indicate no significant difference ( $P<0.05$ ).

| Line# | Mean   |      | StDev |
|-------|--------|------|-------|
| C17   | 1427.0 | a    | 179.0 |
| C26   | 1401.0 | a    | 205.0 |
| C28   | 1294.7 | ab   | 138.2 |
| C18   | 1284.1 | ab   | 30.4  |
| C19   | 1227.5 | ab   | 85.8  |
| C27   | 970.0  | bc   | 664.0 |
| C56   | 633.4  | cd   | 10.5  |
| C41   | 608.0  | cde  | 438.0 |
| C5    | 475.0  | def  | 562.0 |
| C2    | 412.2  | defg | 94.2  |
| C50   | 252.0  | defg | 201.0 |
| C78   | 246.6  | defg | 3.3   |
| C10   | 238.8  | defg | 39.6  |
| C11   | 226.8  | defg | 51.4  |
| C32   | 222.7  | defg | 10.1  |
| C4    | 209.0  | efg  | 107.8 |
| C37   | 199.5  | efg  | 33.5  |
| C6    | 194.6  | efg  | 35.3  |
| C25   | 181.8  | fg   | 70.8  |
| C29   | 175.1  | fg   | 4.4   |
| C20   | 172.0  | fg   | 0.3   |
| C39   | 169.1  | fg   | 72.9  |
| C33   | 166.2  | fg   | 57.2  |
| C7    | 164.7  | fg   | 47.8  |
| C21   | 161.1  | fg   | 1.7   |
| C12   | 161.0  | fg   | 61.8  |
| C15   | 160.2  | fg   | 2.7   |
| C58   | 142.9  | fg   | 2.5   |
| C3    | 138.4  | fg   | 49.6  |
| C68   | 137.8  | fg   | 7.1   |
| C38   | 135.8  | fg   | 18.2  |
| C22   | 135.1  | fg   | 0.3   |
| C8    | 129.4  | fg   | 21.6  |
| C14   | 129.0  | fg   | 3.1   |
| C63   | 125.0  | fg   | 10.1  |
| C30   | 123.7  | fg   | 11.2  |
| C79   | 122.7  | fg   | 0.4   |
| C75   | 121.9  | fg   | 8.7   |
| C1    | 120.8  | fg   | 35.6  |
| C36   | 119.7  | fg   | 11.8  |
| C57   | 119.3  | fg   | 2.7   |
| C31   | 113.9  | fg   | 36.5  |
| C42   | 111.8  | fg   | 1.1   |
| C59   | 111.4  | fg   | 13.2  |

|            |       |    |      |
|------------|-------|----|------|
| <b>C35</b> | 111.0 | fg | 12.6 |
| <b>C34</b> | 111.0 | fg | 16.9 |
| <b>C13</b> | 109.6 | fg | 4.8  |
| <b>C16</b> | 109.6 | fg | 4.8  |
| <b>C76</b> | 102.7 | fg | 0.4  |
| <b>C64</b> | 102.6 | fg | 1.5  |
| <b>C74</b> | 102.2 | fg | 1.1  |
| <b>C49</b> | 96.1  | fg | 7.1  |
| <b>C52</b> | 90.9  | fg | 0.9  |
| <b>C72</b> | 87.8  | fg | 2.4  |
| <b>C51</b> | 84.0  | fg | 37.5 |
| <b>C77</b> | 83.8  | fg | 0.1  |
| <b>C24</b> | 82.7  | fg | 4.9  |
| <b>C23</b> | 82.3  | fg | 2.6  |
| <b>C9</b>  | 81.7  | fg | 0.5  |
| <b>C71</b> | 78.8  | fg | 1.7  |
| <b>C67</b> | 76.8  | fg | 1.8  |
| <b>C45</b> | 74.2  | fg | 16.4 |
| <b>C66</b> | 72.1  | fg | 26.9 |
| <b>C73</b> | 71.0  | fg | 2.3  |
| <b>C44</b> | 70.0  | fg | 12.5 |
| <b>C62</b> | 69.9  | fg | 2.5  |
| <b>C40</b> | 67.9  | fg | 2.9  |
| <b>C70</b> | 66.5  | fg | 1.0  |
| <b>C69</b> | 66.4  | fg | 1.4  |
| <b>C48</b> | 65.7  | fg | 14.2 |
| <b>C55</b> | 63.5  | fg | 2.2  |
| <b>C53</b> | 52.2  | fg | 1.5  |
| <b>C65</b> | 51.1  | fg | 5.5  |
| <b>C54</b> | 50.6  | g  | 2.3  |
| <b>C60</b> | 49.7  | g  | 2.2  |
| <b>C47</b> | 47.7  | g  | 18.2 |
| <b>C46</b> | 42.4  | g  | 13.8 |
| <b>C43</b> | 37.7  | g  | 2.3  |
| <b>C61</b> | 27.3  | g  | 4.3  |
