# Supplementary material
Source: MDPI journal article supplement (https://www.mdpi.com/2073-4395/11/2/207)
Supplement: s1 [file s1]

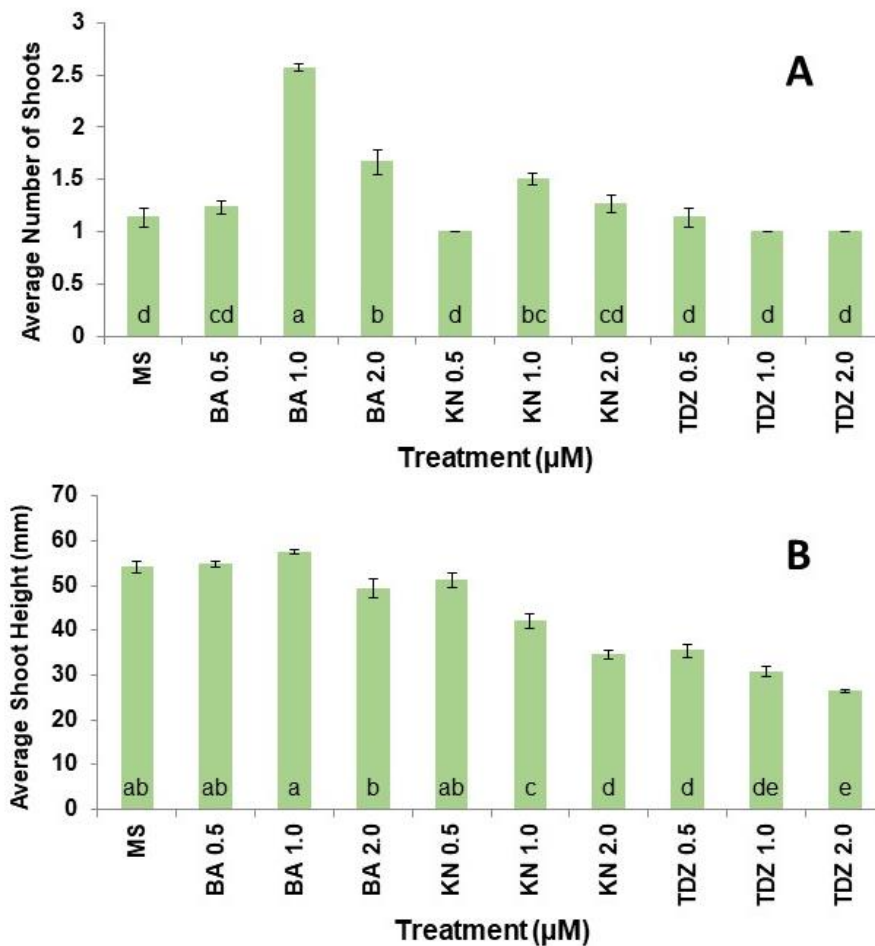

Figure S1: The effect of various concentrations (0, 0.5, 1.0, 2.0  $\mu\text{M}$ ) of 6-benzylaminopurine (BA), kinetin (Kn), or thidiazuron (TDZ) added to Murashige and Skoog basal (MS) medium on average number of shoots (A) and shoot height (B) of 'Vrinda' nodal explants after 4 weeks of culture. Data represent mean  $\pm$  standard error from about ten explants per treatment and three replications. Means from all the treatments were compared with each other using Tukey's test. Vertical bar with same letters indicates no significant difference between treatments at ( $P > 0.05$ ).

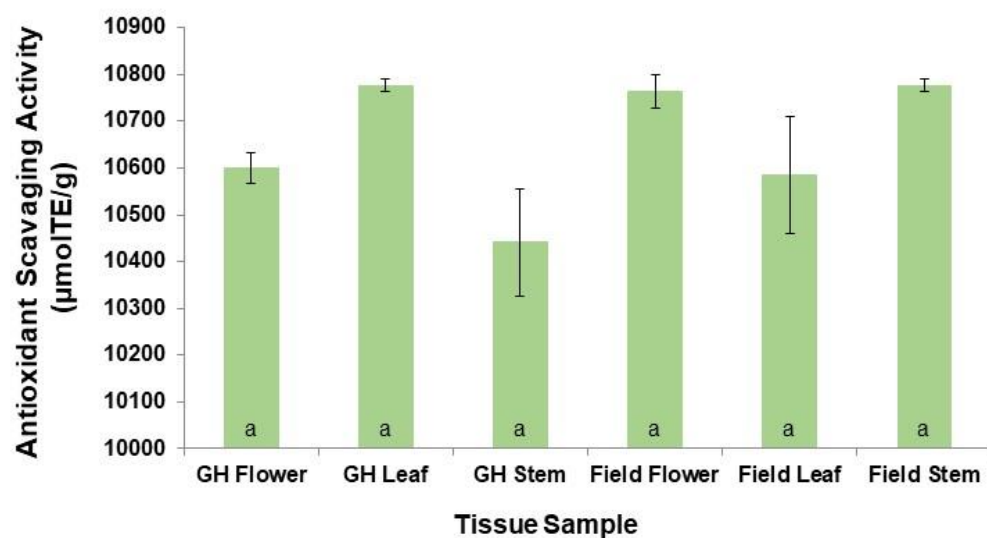

Figure S2: Average antioxidant scavenging activity of greenhouse (GH) and field grown “Vrinda” plants compared to a Trolox equivalent ( $\mu\text{molTE/g}$ ) standard using DPPH antioxidant assay. Names on the x-axis represents sample tissue of flower, leaf and stem of ‘Vrinda’ plant in greenhouse (GH) and field. Data are displayed as mean, with bars representing standard error. Means from all the treatments were compared with each other using Tukey’s test and vertical bar with same letters indicates no significant difference between treatments at ( $P > 0.05$ ).
